# Supplementary material for: Harnessing waste PET bottles for sustainable Ca-MOF synthesis: a high-efficiency adsorbent for uranium and thorium
Source: Royal Society of Chemistry journal article supplement (doi:10.1039/d4ta05010j), 2024-01-01
Supplement: d4ta05010j1.pdf [file d4ta05010j1.pdf]

## Supplementary information

### Harnessing Waste PET Bottles for Sustainable Ca-MOF Synthesis: A High-Efficiency Adsorbent for Uranium and Thorium

Manish Sharma<sup>a</sup>, Anshika<sup>b</sup>, Priya Sharma<sup>b</sup>, Vikash Chandra Janu<sup>c</sup>, Ragini Gupta<sup>\*,a, b</sup>

<sup>a</sup>Materials Research Centre, Malaviya National Institute of Technology Jaipur, Jaipur 302017, India

<sup>b</sup>Department of Chemistry, Malaviya National Institute of Technology Jaipur, Jaipur 302017, India

<sup>c</sup>Defence Research and Development Organization Jodhpur, Jodhpur 342011, India

[\\*rgupta.chy@mnit.ac.in](mailto:*rgupta.chy@mnit.ac.in)

### Contents

**Fig. S1.** FTIR spectra of (a) BDC synthesised from plastic and (b) calcium waste.

**Fig. S2.** Pore size distribution of waste derived Ca-MOF.

**Fig. S3.** FESEM images of (a) chemically derived Ca-MOF and (b) waste-derived Ca-MOF.

**Fig. S4.** TGA of waste derived Ca-MOF.

**Fig. S5.** Effect of pH on the adsorption of U(VI) and Th(IV) ions using waste derived Ca-MOF.

**Fig. S6.** Comparison of removal efficiencies of U(VI) and Th(IV) ions using waste derived Ca-MOF and chemically derived Ca-MOF.

**Fig. S7.** Predicted vs actual diagram obtained from the ANOVA analysis for U(VI).

**Fig. S8.** Predicted vs actual diagram obtained from the ANOVA analysis for Th(IV).

**Table S1** Experimental ranges and levels of independent variables

**Table S2** Analysis of variance (ANOVA) for the removal of U(VI) ions optimization using waste Ca-MOF

**Table S3** Analysis of variance (ANOVA) for the removal of Th(IV) ions optimization using waste Ca-MOF

## Supplementary information

**Text S1:** Here, "calcium waste" refers to calcium derived from the marble industry (Kishangarh marble dumping yard), which primarily consists of calcium carbonate ( $\text{CaCO}_3$ ). Calcium carbonate is an ionic species that does not have any specific type of chemical structure. Basically, the thermodynamically stable form of  $\text{CaCO}_3$  under normal conditions is hexagonal  $\beta$ -  $\text{CaCO}_3$  (the mineral calcite). But other forms are also found, like orthorhombic  $\lambda$ -  $\text{CaCO}_3$  (the mineral aragonite) and hexagonal  $\mu$ -  $\text{CaCO}_3$ , occurring as the mineral vaterite.

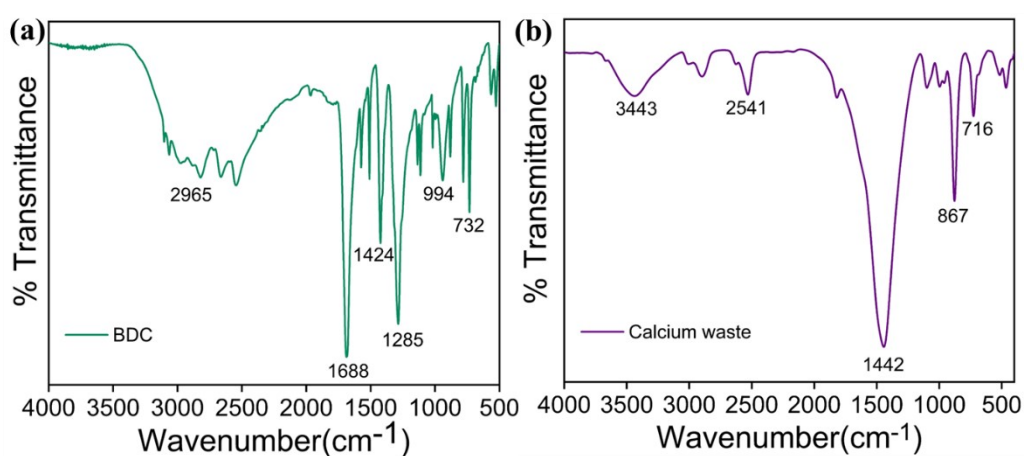

**Fig. S1.** FTIR spectra of (a) BDC synthesised from plastic and (b) calcium waste.

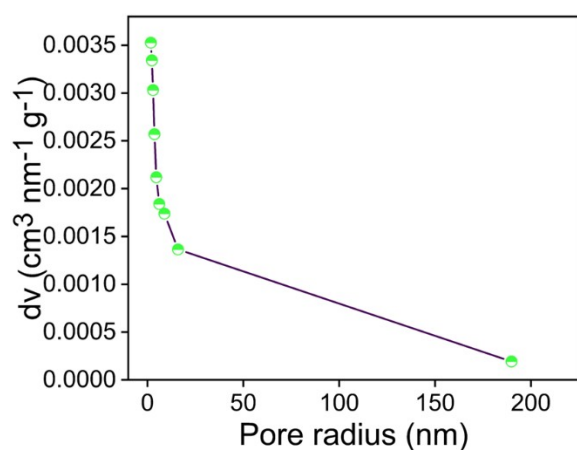

**Fig. S2.** Pore size distribution of waste derived Ca-MOF.

## Supplementary information

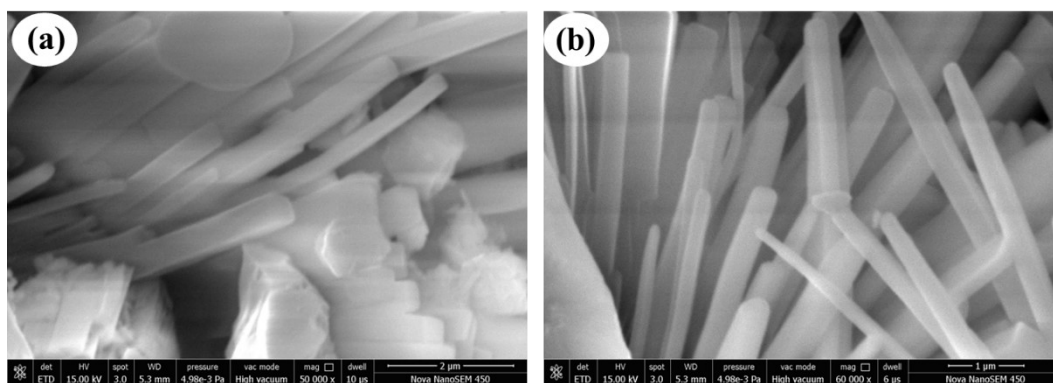

**Fig. S3.** FESEM images of (a) chemically derived Ca-MOF and (b) waste-derived Ca-MOF.

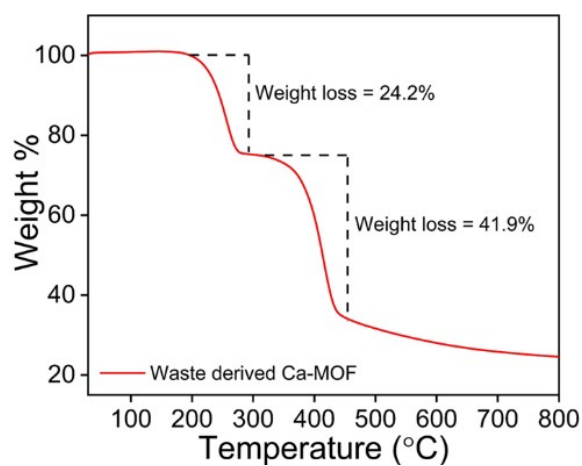

**Fig. S4.** TGA of waste derived Ca-MOF.

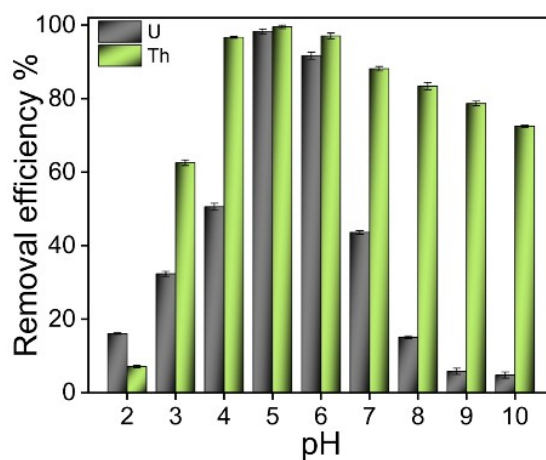

**Fig. S5.** Effect of pH on the adsorption of U(VI) and Th(IV) ions using waste derived Ca-MOF.

## Supplementary information

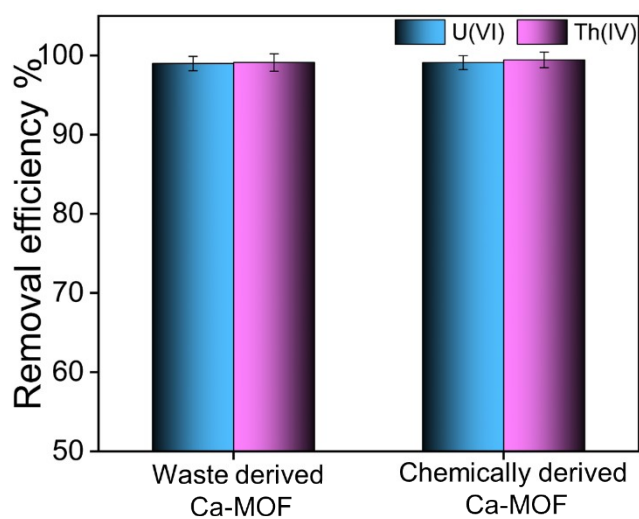

**Fig. S6.** Comparison of removal efficiencies of U(VI) and Th(IV) ions using waste derived Ca-MOF and chemically derived Ca-MOF.

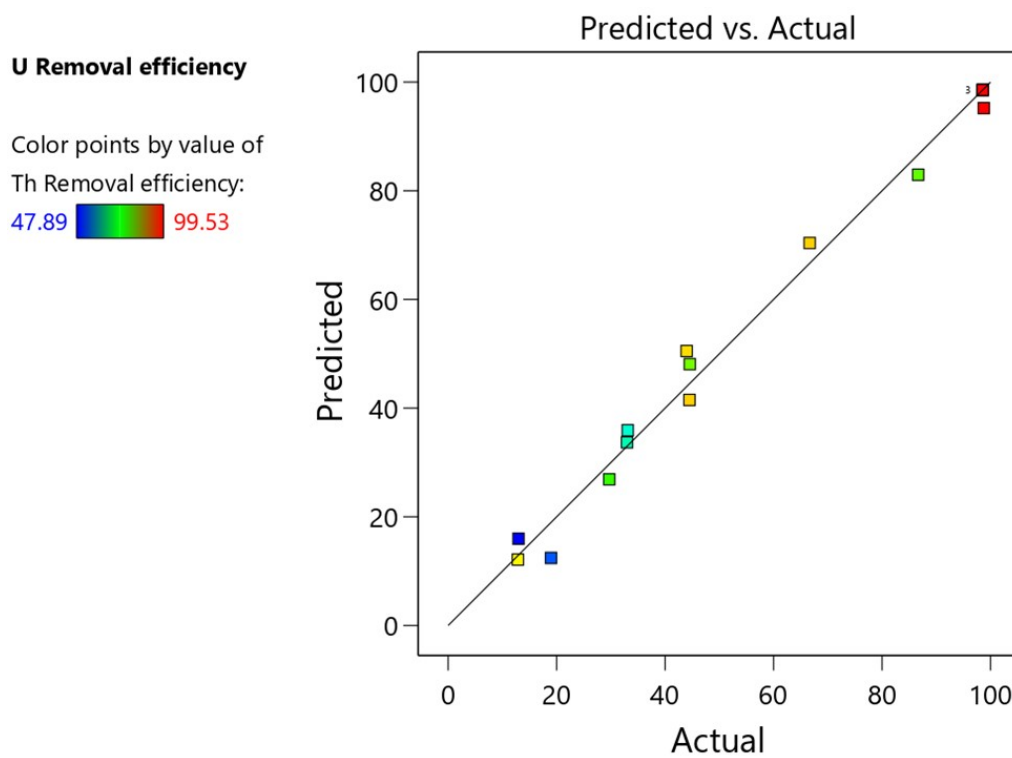

**Fig. S7.** Predicted vs actual diagram obtained from the ANOVA analysis for U(VI).

## Supplementary information

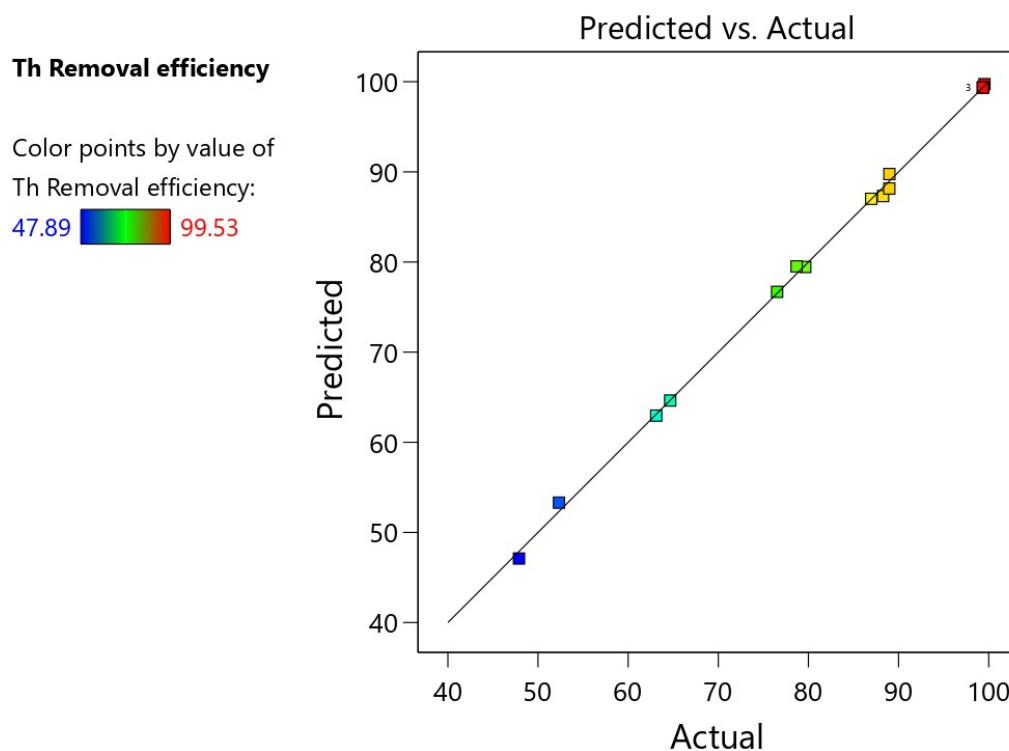

**Fig. S8.** Predicted vs actual diagram obtained from the ANOVA analysis for Th(IV).

**Table S1** Experimental ranges and levels of independent variables

| S. No. | Variables  | Factors range and levels |    |    |
|--------|------------|--------------------------|----|----|
|        |            | -1                       | 0  | 1  |
| 1.     | Mas (mg)   | 2                        | 6  | 10 |
| 2.     | pH         | 3                        | 5  | 7  |
| 3.     | Time (min) | 5                        | 15 | 25 |

### Supplementary information

**Table S2** Analysis of variance (ANOVA) for the removal of U(VI) ions optimization using waste Ca-MOF

| Source                         | Sum of Squares | df | Mean Square | F-value | P-value  |             |
|--------------------------------|----------------|----|-------------|---------|----------|-------------|
| <b>Model</b>                   | 15355.80       | 9  | 1706.20     | 49.30   | 0.0002   | significant |
| A-pH                           | 136.13         | 1  | 136.13      | 3.93    | 0.1042   |             |
| B-Time                         | 597.54         | 1  | 597.54      | 17.26   | 0.0089   |             |
| C-Mass                         | 1779.66        | 1  | 1779.66     | 51.42   | 0.0008   |             |
| AB                             | 7.13           | 1  | 7.13        | 0.2060  | 0.6690   |             |
| AC                             | 73.10          | 1  | 73.10       | 2.11    | 0.2059   |             |
| BC                             | 25.10          | 1  | 25.10       | 0.7252  | 0.4333   |             |
| A <sup>2</sup>                 | 12303.42       | 1  | 12303.42    | 355.48  | < 0.0001 |             |
| B <sup>2</sup>                 | 427.49         | 1  | 427.49      | 12.35   | 0.0170   |             |
| C <sup>2</sup>                 | 686.45         | 1  | 686.45      | 19.83   | 0.0067   |             |
| <b>Residual</b>                | 173.05         | 5  | 34.61       |         |          |             |
| Lack of Fit                    | 173.05         | 3  | 57.68       |         |          |             |
| Pure Error                     | 1.78           | 2  | 0.86        |         |          |             |
| <b>Cor Total</b>               | 15528.86       | 14 |             |         |          |             |
| <b>R<sup>2</sup></b>           | 0.9889         |    |             |         |          |             |
| <b>Adjusted R<sup>2</sup></b>  | 0.9688         |    |             |         |          |             |
| <b>Predicted R<sup>2</sup></b> | 0.8217         |    |             |         |          |             |
| Adeq Precision                 | 17.9920        |    |             |         |          |             |

### Supplementary information

**Table S3** Analysis of variance (ANOVA) for the removal of Th(IV) ions optimization using waste Ca-MOF

| Source                         | Sum of Squares | df | Mean Square | F-value | P-value  |             |
|--------------------------------|----------------|----|-------------|---------|----------|-------------|
| Model                          | 4098.76        | 9  | 455.42      | 495.40  | < 0.0001 | significant |
| A-pH                           | 1589.35        | 1  | 1589.35     | 1728.89 | < 0.0001 |             |
| B-Time                         | 418.18         | 1  | 418.18      | 454.90  | < 0.0001 |             |
| C-Mass                         | 67.63          | 1  | 67.63       | 73.57   | 0.0004   |             |
| AB                             | 1.93           | 1  | 1.93        | 2.10    | 0.2068   |             |
| AC                             | 30.36          | 1  | 30.36       | 33.03   | 0.0022   |             |
| BC                             | 33.18          | 1  | 33.18       | 36.09   | 0.0018   |             |
| A <sup>2</sup>                 | 1777.75        | 1  | 1777.75     | 1933.83 | < 0.0001 |             |
| B <sup>2</sup>                 | 254.21         | 1  | 254.21      | 276.53  | < 0.0001 |             |
| C <sup>2</sup>                 | 70.27          | 1  | 70.27       | 76.44   | 0.0003   |             |
| Residual                       | 4.60           | 5  | 0.9193      |         |          |             |
| Lack of Fit                    | 4.60           | 3  | 1.53        |         |          |             |
| Pure Error                     | 1.56           | 2  | 0.56        |         |          |             |
| Cor Total                      | 4103.35        | 14 |             |         |          |             |
| <b>R<sup>2</sup></b>           | 0.9989         |    |             |         |          |             |
| <b>Adjusted R<sup>2</sup></b>  | 0.9969         |    |             |         |          |             |
| <b>Predicted R<sup>2</sup></b> | 0.9821         |    |             |         |          |             |
| Adeq Precision                 | 67.2124        |    |             |         |          |             |
